# Supplementary material
Source: HighWire-hosted journal article supplement (https://bmjopen.bmj.com/content/9/5/e027175)
Supplement: inline-supplementary-material-1 [file inline-supplementary-material-1.pdf]

**Supplementary Table 1: Multivariable Analysis of Factors Associated with Former Smoker Status (sensitivity analysis, excluding data from the Food Frequency Questionnaire: TV watching, Mediterranean diet) (n=10015)**

| Variable                     | Odds Ratio (95% CI) | P value |
|------------------------------|---------------------|---------|
| <b>Demographic Factors</b>   |                     |         |
| <i>Age</i>                   |                     |         |
| 65+                          | REF                 | <0.001  |
| 45-64                        | 0.33 (0.29-0.37)    |         |
| <i>Sex</i>                   |                     |         |
| Female                       | REF                 | <0.001  |
| Male                         | 1.31 (1.17-1.47)    |         |
| <i>Race</i>                  |                     |         |
| White                        | REF                 | <0.001  |
| Black                        | 0.65 (0.58-0.73)    |         |
| <i>Size of household</i>     | 0.90 (0.86-0.94)    | <0.001  |
| <i>Region</i>                |                     |         |
| West                         | REF                 | 0.03    |
| Northeast                    | 0.77 (0.59-0.99)    |         |
| Midwest                      | 0.74 (0.59-0.92)    |         |
| South                        | 0.75 (0.62-0.91)    |         |
| <i>Living environment</i>    |                     |         |
| Urban                        | REF                 | 0.8     |
| Rural                        | 0.98 (0.83-1.17)    |         |
| Mixed                        | 0.95 (0.80-1.12)    |         |
| <b>Economic Factors</b>      |                     |         |
| <i>Education</i>             |                     |         |
| Less than high school        | REF                 | <0.0001 |
| High school graduate         | 1.09 (0.92-1.29)    |         |
| Some college                 | 1.20 (1.01-1.42)    |         |
| College graduate             | 1.55 (1.28-1.87)    |         |
| <i>Income</i>                |                     |         |
| < \$20K                      | REF                 | 0.006   |
| \$20-\$34                    | 1.14 (0.98-1.32)    |         |
| \$35K-\$74K                  | 1.26 (1.07-1.49)    |         |
| ≥\$75                        | 1.32 (1.07-1.64)    |         |
| Refused to answer            | 1.44 (1.17-1.78)    |         |
| <b>Access to Health Care</b> |                     |         |
| <i>Health Insurance</i>      | 1.32 (1.09-1.60)    | 0.004   |
| <b>Social Factors</b>        |                     |         |
| <i>Marital status</i>        |                     |         |
| Married                      | REF                 | <0.001  |
| Single                       | 0.60 (0.48-0.76)    |         |

|                                                                                                  |                  |         |
|--------------------------------------------------------------------------------------------------|------------------|---------|
| Divorced                                                                                         | 0.56 (0.48-0.65) |         |
| Widowed                                                                                          | 0.66 (0.56-0.77) |         |
| Other                                                                                            | 0.67 (0.49-0.91) |         |
| <i>Number of close friends</i>                                                                   |                  |         |
| <2                                                                                               | REF              |         |
| 2-3                                                                                              | 1.01 (0.85-1.19) | 0.9     |
| 4-5                                                                                              | 1.03 (0.87-1.23) |         |
| >5                                                                                               | 1.00 (0.84-1.20) |         |
| <i>Number of close relatives</i>                                                                 |                  |         |
| <2                                                                                               | REF              |         |
| 2-4                                                                                              | 1.23 (1.04-1.45) | 0.05    |
| 5-8                                                                                              | 1.26 (1.06-1.51) |         |
| >8                                                                                               | 1.16 (0.96-1.39) |         |
| <i>Percentage of close friends and relatives whom the participant sees at least once a month</i> | 1.00 (0.95-1.05) | 0.9     |
| <b>Pre-existing Comorbidities and Self-reported Measures of Health</b>                           |                  |         |
| <i>Coronary Artery Disease</i>                                                                   | 0.97 (0.85-1.11) | 0.7     |
| <i>History of Stroke</i>                                                                         | 0.90 (0.74-1.10) | 0.3     |
| <i>Atrial Fibrillation</i>                                                                       | 1.32 (1.09-1.58) | 0.004   |
| <i>Chronic kidney disease</i>                                                                    | 1.27 (1.07-1.26) | 0.008   |
| <i>Dyslipidemia</i>                                                                              | 1.13 (1.01-1.26) | 0.04    |
| <i>Diabetes</i>                                                                                  | 1.16 (1.02-1.32) | 0.02    |
| <i>Hypertension</i>                                                                              | 1.18 (1.06-1.32) | 0.004   |
| <i>BMI</i>                                                                                       |                  |         |
| Obese                                                                                            | REF              |         |
| Overweight                                                                                       | 0.64 (0.57-0.72) | <0.001  |
| Normal                                                                                           | 0.37 (0.32-0.42) |         |
| Underweight                                                                                      | 0.17 (0.11-0.26) |         |
| <i>SF-12 Physical Summary (1 SD change)</i>                                                      | 1.01 (0.94-1.08) | 0.8     |
| <i>General Health</i>                                                                            |                  |         |
| Excellent                                                                                        | REF              |         |
| Very good                                                                                        | 0.68 (0.57-0.82) | <0.001  |
| Good                                                                                             | 0.52 (0.43-0.63) |         |
| Fair                                                                                             | 0.57 (0.45-0.73) |         |
| Poor                                                                                             | 0.59 (0.41-0.84) |         |
| <i>Perceived Stress Index (1 SD change)</i>                                                      | 0.97 (0.91-1.03) | 0.31    |
| <i>Depression Symptoms (1 SD change)</i>                                                         | 0.96 (0.90-1.03) | 0.3     |
| <i>SF-12 Mental Health Summary (1 SD change)</i>                                                 | 1.13 (1.05-1.22) | 0.0007  |
| <b>Behavioral Factors</b>                                                                        |                  |         |
| <i>Physical activity per week</i>                                                                |                  |         |
| Less than 3x                                                                                     | REF              | <0.0001 |
| 3x or more                                                                                       | 1.30 (1.17-1.44) |         |
| <i>Alcohol consumption</i>                                                                       |                  | <0.001  |

|                                     |                  |        |
|-------------------------------------|------------------|--------|
| Heavy                               | REF              |        |
| Moderate                            | 1.35 (1.09-1.66) |        |
| None                                | 1.57 (1.27-1.94) |        |
| <i>Cigarette smoking</i>            |                  |        |
| Pack years (1 pack change)          | 0.98 (0.98-0.98) | <0.001 |
| <i>Cigarette smoking</i>            |                  |        |
| Age started smoking (1 year change) | 0.96 (0.95-0.97) | <0.001 |
| <i>Medication adherence</i>         |                  |        |
| Low                                 | REF              |        |
| Medium                              | 1.06 (0.75-1.47) | 0.17   |
| High                                | 0.95 (0.69-1.31) |        |
